# Supplementary material
Source: Elsevier journal article supplement (http://raiithold.iith.ac.in/1359/2/mmc2.pdf)

# checkCIF/PLATON report

Structure factors have been supplied for datablock(s) 1

THIS REPORT IS FOR GUIDANCE ONLY. IF USED AS PART OF A REVIEW PROCEDURE FOR PUBLICATION, IT SHOULD NOT REPLACE THE EXPERTISE OF AN EXPERIENCED CRYSTALLOGRAPHIC REFEREE.

No syntax errors found.      CIF dictionary      Interpreting this report

## Datablock: 1

---

Bond precision:    C-C = 0.0336 A                      Wavelength=1.54180

Cell:              a=11.9727(9)              b=12.3610(9)              c=12.8053(10)  
                    alpha=66.932(7)              beta=62.152(8)              gamma=63.125(7)

Temperature:      150 K

|                | Calculated                  | Reported                |
|----------------|-----------------------------|-------------------------|
| Volume         | 1454.9(2)                   | 1454.9(2)               |
| Space group    | P -1                        | P -1                    |
| Hall group     | -P 1                        | -P 1                    |
| Moiety formula | C54 H72 N4 S2, 2(C F3 O3 S) | C27 H36 N2 S, C F3 O3 S |
| Sum formula    | C56 H72 F6 N4 O6 S4         | C28 H36 F3 N2 O3 S2     |
| Mr             | 1139.42                     | 569.74                  |
| Dx, g cm-3     | 1.301                       | 1.300                   |
| Z              | 1                           | 2                       |
| Mu (mm-1)      | 2.094                       | 2.094                   |
| F000           | 602.0                       | 605.2                   |
| F000'          | 605.13                      |                         |
| h,k,lmax       | 14,15,15                    | 14,15,15                |
| Nref           | 5752                        | 4780                    |
| Tmin,Tmax      | 0.720,0.778                 | 0.456,1.000             |
| Tmin'          | 0.653                       |                         |

Correction method= MULTI-SCAN

Data completeness= 0.831                      Theta(max)= 72.420

R(reflections)= 0.3194( 2536)              wR2(reflections)= 0.7521( 4780)

S = 3.400                                      Npar= 350

---

The following ALERTS were generated. Each ALERT has the format

**test-name\_ALERT\_alert-type\_alert-level.**

Click on the hyperlinks for more details of the test.

---

**Alert level A**

RFACG01\_ALERT\_3\_A The value of the R factor is > 0.20  
R factor given 0.319  
RFACR01\_ALERT\_3\_A The value of the weighted R factor is > 0.45  
Weighted R factor given 0.752  
PLAT029\_ALERT\_3\_A \_diffn\_measured\_fraction\_theta\_full Low ..... 0.831 Note  
PLAT082\_ALERT\_2\_A High R1 Value ..... 0.32 Report  
PLAT084\_ALERT\_3\_A High wR2 Value (i.e. > 0.25) ..... 0.75 Report  
PLAT234\_ALERT\_4\_A Large Hirshfeld Difference C2 -- C3 .. 0.32 Ang.

---

**Alert level B**

DIFMN02\_ALERT\_2\_B The minimum difference density is < -0.1\*ZMAX\*1.00  
\_refine\_diff\_density\_min given = -2.493  
Test value = -1.600  
DIFMX01\_ALERT\_2\_B The maximum difference density is > 0.1\*ZMAX\*1.00  
\_refine\_diff\_density\_max given = 2.750  
Test value = 1.600  
SHFSU01\_ALERT\_2\_B The absolute value of parameter shift to su ratio > 0.10  
Absolute value of the parameter shift to su ratio given 0.157  
Additional refinement cycles may be required.  
PLAT080\_ALERT\_2\_B Maximum Shift/Error ..... 0.16  
PLAT097\_ALERT\_2\_B Large Reported Max. (Positive) Residual Density 2.75 eA-3  
PLAT098\_ALERT\_2\_B Large Reported Min. (Negative) Residual Density -2.49 eA-3  
PLAT234\_ALERT\_4\_B Large Hirshfeld Difference F3 -- C28 .. 0.28 Ang.  
PLAT242\_ALERT\_2\_B Low Ueq as Compared to Neighbors for ..... C13 Check  
PLAT340\_ALERT\_3\_B Low Bond Precision on C-C Bonds ..... 0.0336 Ang.

---

**Alert level C**

DIFMN03\_ALERT\_1\_C The minimum difference density is < -0.1\*ZMAX\*0.75  
The relevant atom site should be identified.  
DIFMX02\_ALERT\_1\_C The maximum difference density is > 0.1\*ZMAX\*0.75  
The relevant atom site should be identified.  
GOODF01\_ALERT\_2\_C The least squares goodness of fit parameter lies  
outside the range 0.80 <> 2.00  
Goodness of fit given = 3.400  
PLAT068\_ALERT\_1\_C Reported F000 Differs from Calcd (or Missing)... Please Check  
PLAT087\_ALERT\_2\_C Unsatisfactory S value (Too High) ..... 3.40 Check  
PLAT234\_ALERT\_4\_C Large Hirshfeld Difference N2 -- C3 .. 0.22 Ang.  
PLAT234\_ALERT\_4\_C Large Hirshfeld Difference C17 -- C18 .. 0.22 Ang.  
PLAT234\_ALERT\_4\_C Large Hirshfeld Difference S2 -- O1 .. 0.25 Ang.  
PLAT234\_ALERT\_4\_C Large Hirshfeld Difference S2 -- O3 .. 0.18 Ang.  
PLAT241\_ALERT\_2\_C High Ueq as Compared to Neighbors for ..... C3 Check  
PLAT241\_ALERT\_2\_C High Ueq as Compared to Neighbors for ..... C10 Check  
PLAT241\_ALERT\_2\_C High Ueq as Compared to Neighbors for ..... C20 Check  
PLAT242\_ALERT\_2\_C Low Ueq as Compared to Neighbors for ..... C19 Check  
PLAT242\_ALERT\_2\_C Low Ueq as Compared to Neighbors for ..... C25 Check  
PLAT243\_ALERT\_4\_C High 'Solvent' Ueq as Compared to Neighbors of C28 Check  
PLAT244\_ALERT\_4\_C Low 'Solvent' Ueq as Compared to Neighbors of S2 Check  
PLAT250\_ALERT\_2\_C Large U3/U1 Ratio for Average U(i,j) Tensor .... 3.7 Note  
PLAT250\_ALERT\_2\_C Large U3/U1 Ratio for Average U(i,j) Tensor .... 2.8 Note  
PLAT360\_ALERT\_2\_C Short C(sp3)-C(sp3) Bond C13 - C14 ... 1.43 Ang.

---

**Alert level G**

PLAT005\_ALERT\_5\_G No \_iucr\_refine\_instructions\_details in the CIF Please Do !  
PLAT042\_ALERT\_1\_G Calc. and Reported MoietyFormula Strings Differ Please Check  
PLAT045\_ALERT\_1\_G Calculated and Reported Z Differ by ..... 0.50 Ratio  
PLAT072\_ALERT\_2\_G SHELXL First Parameter in WGHT Unusually Large. 0.20 Report  
PLAT231\_ALERT\_4\_G Hirshfeld Test (Solvent) F2 -- C28 .. 6.0 su

|                   |                                               |       |                   |          |       |       |
|-------------------|-----------------------------------------------|-------|-------------------|----------|-------|-------|
| PLAT333_ALERT_2_G | Check Large Av C6-Ring C-C Dist. C16          | -C21  |                   |          | 1.42  | Ang.  |
| PLAT434_ALERT_2_G | Short Inter HL..HL Contact F1                 | .. F1 | .                 |          | 2.70  | Ang.  |
| PLAT790_ALERT_4_G | Centre of Gravity not Within Unit Cell: Resd. | #     |                   |          | 2     | Note  |
|                   | C F3 O3 S                                     |       |                   |          |       |       |
| PLAT982_ALERT_1_G | The C-f' =                                    | 0.019 | Deviates from the | IT-value | 0.018 | Check |
| PLAT982_ALERT_1_G | The F-f' =                                    | 0.075 | Deviates from the | IT-value | 0.073 | Check |
| PLAT982_ALERT_1_G | The N-f' =                                    | 0.033 | Deviates from the | IT-value | 0.031 | Check |
| PLAT982_ALERT_1_G | The O-f' =                                    | 0.052 | Deviates from the | IT-value | 0.049 | Check |
| PLAT982_ALERT_1_G | The S-f' =                                    | 0.335 | Deviates from the | IT-value | 0.333 | Check |

---

6 **ALERT level A** = Most likely a serious problem - resolve or explain  
9 **ALERT level B** = A potentially serious problem, consider carefully  
19 **ALERT level C** = Check. Ensure it is not caused by an omission or oversight  
13 **ALERT level G** = General information/check it is not something unexpected

10 ALERT type 1 CIF construction/syntax error, inconsistent or missing data  
21 ALERT type 2 Indicator that the structure model may be wrong or deficient  
5 ALERT type 3 Indicator that the structure quality may be low  
10 ALERT type 4 Improvement, methodology, query or suggestion  
1 ALERT type 5 Informative message, check

---

It is advisable to attempt to resolve as many as possible of the alerts in all categories. Often the minor alerts point to easily fixed oversights, errors and omissions in your CIF or refinement strategy, so attention to these fine details can be worthwhile. In order to resolve some of the more serious problems it may be necessary to carry out additional measurements or structure refinements. However, the purpose of your study may justify the reported deviations and the more serious of these should normally be commented upon in the discussion or experimental section of a paper or in the "special\_details" fields of the CIF. checkCIF was carefully designed to identify outliers and unusual parameters, but every test has its limitations and alerts that are not important in a particular case may appear. Conversely, the absence of alerts does not guarantee there are no aspects of the results needing attention. It is up to the individual to critically assess their own results and, if necessary, seek expert advice.

### Publication of your CIF in IUCr journals

A basic structural check has been run on your CIF. These basic checks will be run on all CIFs submitted for publication in IUCr journals (*Acta Crystallographica*, *Journal of Applied Crystallography*, *Journal of Synchrotron Radiation*); however, if you intend to submit to *Acta Crystallographica Section C* or *E*, you should make sure that full publication checks are run on the final version of your CIF prior to submission.

### Publication of your CIF in other journals

Please refer to the *Notes for Authors* of the relevant journal for any special instructions relating to CIF submission.

---

**PLATON version of 20/08/2014; check.def file version of 18/08/2014**



# checkCIF/PLATON report

Structure factors have been supplied for datablock(s) 2

THIS REPORT IS FOR GUIDANCE ONLY. IF USED AS PART OF A REVIEW PROCEDURE FOR PUBLICATION, IT SHOULD NOT REPLACE THE EXPERTISE OF AN EXPERIENCED CRYSTALLOGRAPHIC REFEREE.

No syntax errors found.      CIF dictionary      Interpreting this report

## Datablock: 2

---

Bond precision:    C-C = 0.0038 A                      Wavelength=1.54180

Cell:                      a=11.7507(8)              b=12.2346(8)              c=12.6554(8)  
                                    alpha=89.826(5)              beta=64.316(7)              gamma=65.087(7)  
Temperature:    150 K

|                | Calculated                   | Reported                     |
|----------------|------------------------------|------------------------------|
| Volume         | 1450.8(2)                    | 1450.74(17)                  |
| Space group    | P -1                         | P -1                         |
| Hall group     | -P 1                         | -P 1                         |
| Moiety formula | C54 H72 N4 Se2, 2(C F3 O3 S) | C54 H72 N4 Se2, 2(C F3 O3 S) |
| Sum formula    | C56 H72 F6 N4 O6 S2 Se2      | C56 H72 F6 N4 O6 S2 Se2      |
| Mr             | 1233.22                      | 1233.22                      |
| Dx,g cm-3      | 1.411                        | 1.412                        |
| Z              | 1                            | 1                            |
| Mu (mm-1)      | 2.862                        | 2.862                        |
| F000           | 638.0                        | 638.0                        |
| F000'          | 638.86                       |                              |
| h,k,lmax       | 14,14,15                     | 14,14,15                     |
| Nref           | 5592                         | 5461                         |
| Tmin,Tmax      | 0.627,0.709                  | 0.954,1.000                  |
| Tmin'          | 0.537                        |                              |

Correction method= MULTI-SCAN

Data completeness= 0.977                      Theta(max)= 70.770

R(reflections)= 0.0336( 4878)              wR2(reflections)= 0.0859( 5461)

S = 1.022                                      Npar= 351

---

The following ALERTS were generated. Each ALERT has the format  
**test-name\_ALERT\_alert-type\_alert-level.**  
Click on the hyperlinks for more details of the test.

---

### ● Alert level C

|                   |                                      |                                  |                         |       |       |
|-------------------|--------------------------------------|----------------------------------|-------------------------|-------|-------|
| PLAT029_ALERT_3_C | _diffrn_measured_fraction_theta_full | Low                              | .....                   | 0.977 | Note  |
| PLAT220_ALERT_2_C | Large Non-Solvent                    | C                                | Ueq(max)/Ueq(min) Range | 3.5   | Ratio |
| PLAT242_ALERT_2_C | Low                                  | Ueq as Compared to Neighbors for | .....                   | C10   | Check |
| PLAT242_ALERT_2_C | Low                                  | Ueq as Compared to Neighbors for | .....                   | C22   | Check |

---

### ● Alert level G

|                   |                                                |            |   |             |
|-------------------|------------------------------------------------|------------|---|-------------|
| PLAT005_ALERT_5_G | No _iucr_refine_instructions_details           | in the CIF |   | Please Do ! |
| PLAT093_ALERT_1_G | No su's on H-positions, refinement reported as | .          |   | mixed       |
| PLAT152_ALERT_1_G | The Supplied and Calc. Volume s.u. Differ by   | ...        |   | 3 Units     |
| PLAT244_ALERT_4_G | Low 'Solvent' Ueq as Compared to Neighbors of  |            |   | C28 Check   |
| PLAT434_ALERT_2_G | Short Inter HL..HL Contact                     | F3 .. F3   | . | 2.83 Ang.   |

---

- 0 **ALERT level A** = Most likely a serious problem - resolve or explain  
0 **ALERT level B** = A potentially serious problem, consider carefully  
4 **ALERT level C** = Check. Ensure it is not caused by an omission or oversight  
5 **ALERT level G** = General information/check it is not something unexpected
- 2 ALERT type 1 CIF construction/syntax error, inconsistent or missing data  
4 ALERT type 2 Indicator that the structure model may be wrong or deficient  
1 ALERT type 3 Indicator that the structure quality may be low  
1 ALERT type 4 Improvement, methodology, query or suggestion  
1 ALERT type 5 Informative message, check
- 

It is advisable to attempt to resolve as many as possible of the alerts in all categories. Often the minor alerts point to easily fixed oversights, errors and omissions in your CIF or refinement strategy, so attention to these fine details can be worthwhile. In order to resolve some of the more serious problems it may be necessary to carry out additional measurements or structure refinements. However, the purpose of your study may justify the reported deviations and the more serious of these should normally be commented upon in the discussion or experimental section of a paper or in the "special\_details" fields of the CIF. checkCIF was carefully designed to identify outliers and unusual parameters, but every test has its limitations and alerts that are not important in a particular case may appear. Conversely, the absence of alerts does not guarantee there are no aspects of the results needing attention. It is up to the individual to critically assess their own results and, if necessary, seek expert advice.

### Publication of your CIF in IUCr journals

A basic structural check has been run on your CIF. These basic checks will be run on all CIFs submitted for publication in IUCr journals (*Acta Crystallographica*, *Journal of Applied Crystallography*, *Journal of Synchrotron Radiation*); however, if you intend to submit to *Acta Crystallographica Section C* or *E*, you should make sure that full publication checks are run on the final version of your CIF prior to submission.

### Publication of your CIF in other journals

Please refer to the *Notes for Authors* of the relevant journal for any special instructions relating to CIF submission.

PLATON version of 20/08/2014; check.def file version of 18/08/2014

Datablock 2 - ellipsoid plot

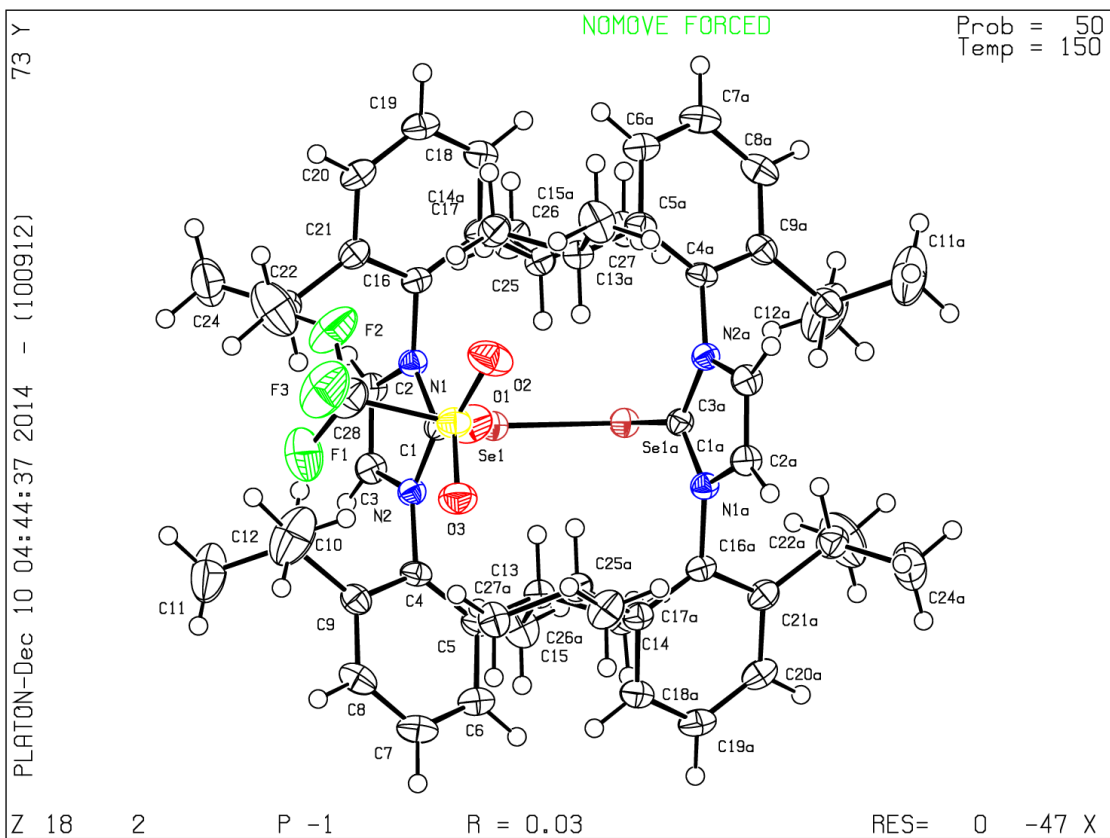

# checkCIF/PLATON report

Structure factors have been supplied for datablock(s) 3

THIS REPORT IS FOR GUIDANCE ONLY. IF USED AS PART OF A REVIEW PROCEDURE FOR PUBLICATION, IT SHOULD NOT REPLACE THE EXPERTISE OF AN EXPERIENCED CRYSTALLOGRAPHIC REFEREE.

No syntax errors found.      CIF dictionary      Interpreting this report

## Datablock: 3

---

|                 |                                     |                                     |              |
|-----------------|-------------------------------------|-------------------------------------|--------------|
| Bond precision: | C-C = 0.0111 A                      | Wavelength=0.71070                  |              |
| Cell:           | a=13.3074(3)                        | b=18.1568(3)                        | c=18.3035(3) |
|                 | alpha=90                            | beta=90                             | gamma=90     |
| Temperature:    | 150 K                               |                                     |              |
|                 | Calculated                          | Reported                            |              |
| Volume          | 4422.49(14)                         | 4422.51(13)                         |              |
| Space group     | P 21 21 21                          | P 21 21 21                          |              |
| Hall group      | P 2ac 2ab                           | P 2ac 2ab                           |              |
| Moiety formula  | C36 H48 N4 O4 Se2, 2(Cl O4), C H4 O | C36 H48 N4 O4 Se2, 2(Cl O4), C H4 O |              |
| Sum formula     | C37 H52 Cl2 N4 O13 Se2              | C37 H52 Cl2 N4 O13 Se2              |              |
| Mr              | 989.65                              | 989.67                              |              |
| Dx, g cm-3      | 1.486                               | 1.486                               |              |
| Z               | 4                                   | 4                                   |              |
| Mu (mm-1)       | 1.857                               | 1.857                               |              |
| F000            | 2032.0                              | 2033.5                              |              |
| F000'           | 2033.34                             |                                     |              |
| h,k,lmax        | 18,24,25                            | 17,24,23                            |              |
| Nref            | 11848[ 6506]                        | 9590                                |              |
| Tmin,Tmax       | 0.895,0.928                         | 0.897,1.000                         |              |
| Tmin'           | 0.862                               |                                     |              |

Correction method= MULTI-SCAN

Data completeness= 1.47/0.81      Theta(max)= 29.090

R(reflections)= 0.0651( 8380)      wR2(reflections)= 0.1706( 9590)

S = 1.032      Npar= 536

---

The following ALERTS were generated. Each ALERT has the format  
**test-name\_ALERT\_alert-type\_alert-level.**  
Click on the hyperlinks for more details of the test.



---

**Alert level A**

PLAT029\_ALERT\_3\_A \_diffrn\_measured\_fraction\_theta\_full Low ..... 0.810 Note  
PLAT430\_ALERT\_2\_A Short Inter D...A Contact Sel .. 05 .. 2.88 Ang.

---

**Alert level C**

STRVA01\_ALERT\_2\_C Chirality of atom sites is inverted?  
From the CIF: \_refine\_ls\_abs\_structure\_Flack 0.983  
From the CIF: \_refine\_ls\_abs\_structure\_Flack\_su 0.007  
PLAT068\_ALERT\_1\_C Reported F000 Differs from Calcd (or Missing)... Please Check  
PLAT220\_ALERT\_2\_C Large Non-Solvent C Ueq(max)/Ueq(min) Range 3.3 Ratio  
PLAT242\_ALERT\_2\_C Low Ueq as Compared to Neighbors for ..... C13 Check  
PLAT341\_ALERT\_3\_C Low Bond Precision on C-C Bonds ..... 0.0111 Ang.

---

**Alert level G**

PLAT005\_ALERT\_5\_G No \_iucr\_refine\_instructions\_details in the CIF Please Do !  
PLAT033\_ALERT\_4\_G Flack x Value Deviates > 2\*sigma from Zero ..... 0.983  
PLAT083\_ALERT\_2\_G SHELXL Second Parameter in WGHT Unusually Large. 20.13 Why ?  
PLAT164\_ALERT\_4\_G Nr. of Refined C-H H-Atoms in Heavy-Atom Struct. 33 Note  
PLAT244\_ALERT\_4\_G Low 'Solvent' Ueq as Compared to Neighbors of C11 Check  
PLAT244\_ALERT\_4\_G Low 'Solvent' Ueq as Compared to Neighbors of C12 Check  
PLAT432\_ALERT\_2\_G Short Inter X...Y Contact 08 .. C23 .. 2.91 Ang.  
PLAT432\_ALERT\_2\_G Short Inter X...Y Contact 09 .. C19 .. 2.93 Ang.  
PLAT432\_ALERT\_2\_G Short Inter X...Y Contact 09 .. C23 .. 2.98 Ang.  
PLAT432\_ALERT\_2\_G Short Inter X...Y Contact 012 .. C2 .. 3.02 Ang.  
PLAT952\_ALERT\_5\_G Calculated (ThMax) and CIF-Reported Lmax Differ 2 Units  
PLAT982\_ALERT\_1\_G The Se-f' = -0.081 Deviates from the IT-value -0.093 Check  
PLAT983\_ALERT\_1\_G The Se-f" = 2.308 Deviates from the IT-Value 2.226 Check

---

2 **ALERT level A** = Most likely a serious problem - resolve or explain  
0 **ALERT level B** = A potentially serious problem, consider carefully  
5 **ALERT level C** = Check. Ensure it is not caused by an omission or oversight  
13 **ALERT level G** = General information/check it is not something unexpected

3 ALERT type 1 CIF construction/syntax error, inconsistent or missing data  
9 ALERT type 2 Indicator that the structure model may be wrong or deficient  
2 ALERT type 3 Indicator that the structure quality may be low  
4 ALERT type 4 Improvement, methodology, query or suggestion  
2 ALERT type 5 Informative message, check

---

It is advisable to attempt to resolve as many as possible of the alerts in all categories. Often the minor alerts point to easily fixed oversights, errors and omissions in your CIF or refinement strategy, so attention to these fine details can be worthwhile. In order to resolve some of the more serious problems it may be necessary to carry out additional measurements or structure refinements. However, the purpose of your study may justify the reported deviations and the more serious of these should normally be commented upon in the discussion or experimental section of a paper or in the "special\_details" fields of the CIF. checkCIF was carefully designed to identify outliers and unusual parameters, but every test has its limitations and alerts that are not important in a particular case may appear. Conversely, the absence of alerts does not guarantee there are no aspects of the results needing attention. It is up to the individual to critically assess their own results and, if necessary, seek expert advice.

### **Publication of your CIF in IUCr journals**

A basic structural check has been run on your CIF. These basic checks will be run on all CIFs submitted for publication in IUCr journals (*Acta Crystallographica*, *Journal of Applied Crystallography*, *Journal of Synchrotron Radiation*); however, if you intend to submit to *Acta Crystallographica Section C* or *E*, you should make sure that full publication checks are run on the final version of your CIF prior to submission.

### **Publication of your CIF in other journals**

Please refer to the *Notes for Authors* of the relevant journal for any special instructions relating to CIF submission.

---

**PLATON version of 20/08/2014; check.def file version of 18/08/2014**

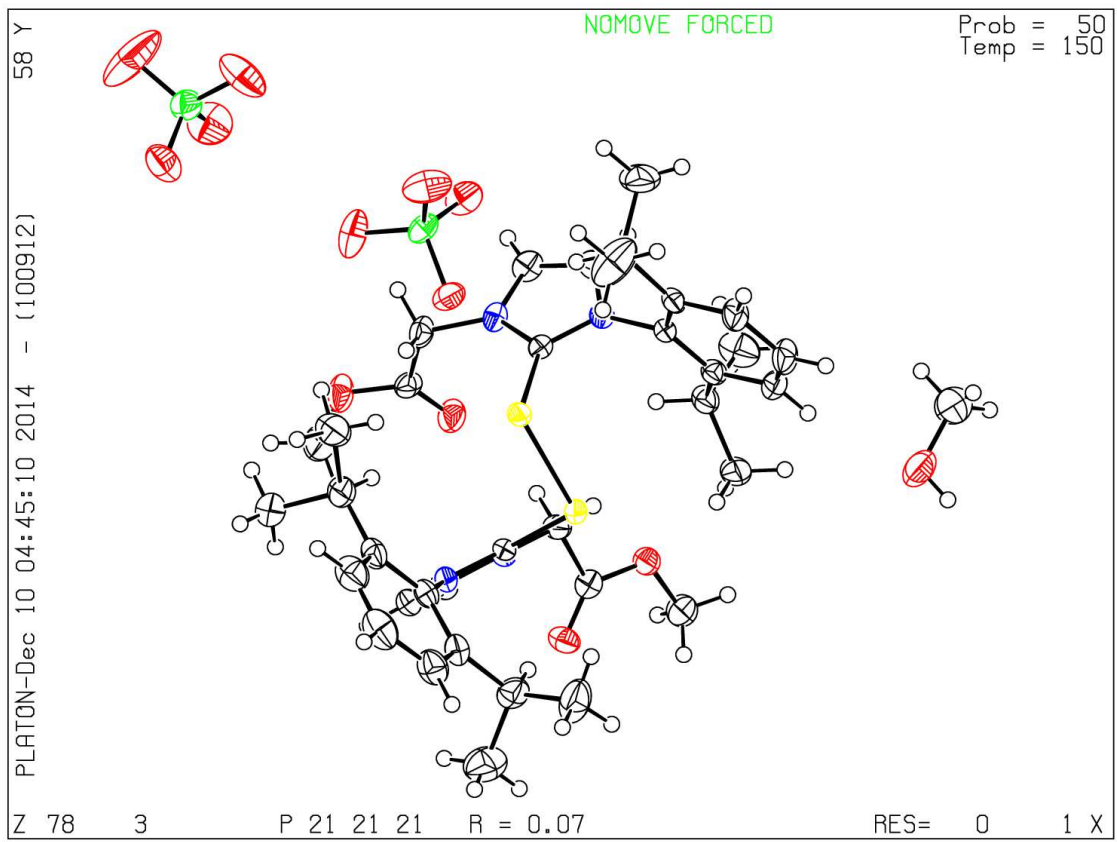

Supplement: mmc2 [file mmc2.pdf]
